# Supplementary material for: Patient-Reported Outcomes among Multiple Myeloma Patients Treated with Standard of Care Idecabtagene Vicleucel
Source: MDPI journal article supplement (doi:10.3390/cancers15194711), 2023-09-25
Supplement: s1 [file s1]

**Supplemental Table S1.** Schedule and content of patient-reported outcome assessments.

| Measure                  | Construct     | BL | D0 | D1-D6 | D7 | D14 | D21 | D30 | D60 | D90 |
|--------------------------|---------------|----|----|-------|----|-----|-----|-----|-----|-----|
| Demographics Survey      | Demographics  | X  |    |       |    |     |     |     |     |     |
| CCI                      | Comorbidities | X  |    |       |    |     |     |     |     |     |
| FACT-G                   | HRQOL         | X  | X  |       | X  | X   | X   | X   | X   | X   |
| FACT-G7                  | HRQOL         |    | X* | X     |    |     |     |     |     |     |
| PROMIS-29+2 Profile v2.1 | Symptoms      | X  | X  |       | X  | X   | X   | X   | X   | X   |
| PRO-CTCAE items          | Symptoms      | X  | X  |       | X  | X   | X   | X   | X   | X   |

Abbreviations: BL, baseline; CCI, Charlson Comorbidity Index; D, day; FACT-G, Functional Assessment of Cancer Therapy-General; HRQOL, health-related quality of life; PRO-CTCAE, Patient-Reported Outcomes Version of the Common Terminology Criteria for Adverse Events; PROMIS, Patient-Reported Outcomes Measurement Information System. Notes: D0 was day of CAR T-cell infusion.

\*A FACT-G7 score was derived from the FACT-G on D0 to facilitate statistical analyses.

**Supplemental Table S2.** Associations between patient characteristics and patient-reported outcomes at baseline (N=42).

|                          | Age      |          | Sex      |          | Race/ Ethnicity |          | Education |          | Extra-medullary disease |          | High marrow burden |          | Bridging therapy |          | No. of prior therapies |          | Refractory status |          | KarMMa eligibility |          |
|--------------------------|----------|----------|----------|----------|-----------------|----------|-----------|----------|-------------------------|----------|--------------------|----------|------------------|----------|------------------------|----------|-------------------|----------|--------------------|----------|
|                          | <i>t</i> | <i>p</i> | <i>t</i> | <i>p</i> | <i>t</i>        | <i>p</i> | <i>t</i>  | <i>p</i> | <i>t</i>                | <i>p</i> | <i>t</i>           | <i>p</i> | <i>t</i>         | <i>p</i> | <i>t</i>               | <i>p</i> | <i>t</i>          | <i>p</i> | <i>t</i>           | <i>p</i> |
| FACT-G                   |          |          |          |          |                 |          |           |          |                         |          |                    |          |                  |          |                        |          |                   |          |                    |          |
| Overall HRQOL            | -0.33    | 0.74     | 1.05     | 0.30     | 0.85            | 0.40     | 1.75      | 0.09     | -1.01                   | 0.32     | -0.79              | 0.43     | -1.77            | 0.08     | -0.33                  | 0.75     | 0.25              | 0.80     | -0.23              | 0.82     |
| Functional well-being    | -0.59    | 0.56     | 0.60     | 0.55     | 0.68            | 0.50     | 1.67      | 0.10     | -0.73                   | 0.47     | -0.33              | 0.74     | -1.60            | 0.12     | 0.13                   | 0.90     | 0.03              | 0.98     | -0.20              | 0.85     |
| Physical well-being      | 0.50     | 0.62     | 0.45     | 0.66     | 1.82            | 0.08     | 0.89      | 0.38     | -2.78                   | 0.008*   | -0.86              | 0.40     | -1.96            | 0.06     | 0.44                   | 0.67     | -1.73             | 0.09     | -0.66              | 0.51     |
| Emotional well-being     | -0.54    | 0.59     | 0.21     | 0.84     | 0.21            | 0.84     | 0.88      | 0.38     | 1.35                    | 0.19     | -1.69              | 0.10     | -0.63            | 0.53     | -2.19                  | 0.03     | 118               | 0.24     | 0.07               | 0.95     |
| Social well-being        | -0.41    | 0.68     | 1.85     | 0.07     | -1.00           | 0.32     | 4.56      | <0.001*  | 0.13                    | 0.90     | 0.76               | 0.45     | 0.03             | 0.98     | 0.14                   | 0.89     | 2.25              | 0.03     | 0.45               | 0.66     |
| PROMIS-29+2 Profile v2.1 |          |          |          |          |                 |          |           |          |                         |          |                    |          |                  |          |                        |          |                   |          |                    |          |
| Fatigue                  | 1.23     | 0.23     | -1.18    | 0.24     | 1.32            | 0.20     | -0.25     | 0.80     | 1.29                    | 0.21     | -0.18              | 0.86     | 2.35             | 0.02     | -0.36                  | 0.72     | 1.20              | 0.24     | 0.70               | 0.49     |
| Pain interference        | -0.30    | 0.76     | -2.04    | 0.05     | -1.08           | 0.29     | -0.55     | 0.58     | 2.19                    | 0.03     | 0.32               | 0.75     | 0.47             | 0.64     | -0.56                  | 0.58     | 0.78              | 0.44     | 2.49               | 0.02     |
| Sleep disturbance        | -1.29    | 0.20     | -0.88    | 0.39     | -0.55           | 0.58     | -0.14     | 0.89     | 1.81                    | 0.08     | 1.21               | 0.23     | 0.07             | 0.94     | 1.50                   | 0.14     | 1.59              | 0.12     | 1.57               | 0.12     |
| Depression               | 1.02     | 0.31     | -1.87    | 0.07     | 0.84            | 0.41     | -2.30     | 0.03     | 0.05                    | 0.96     | 0.03               | 0.97     | 1.54             | 0.13     | 0.66                   | 0.51     | -0.53             | 0.60     | 0.41               | 0.69     |
| Anxiety                  | 0.43     | 0.67     | -0.98    | 0.33     | 0.34            | 0.74     | -0.02     | 0.99     | -0.73                   | 0.49     | 0.95               | 0.35     | 1.04             | 0.30     | 0.80                   | 0.43     | -0.32             | 0.75     | -0.55              | 0.58     |
| Global pain              | -0.77    | 0.45     | -1.25    | 0.22     | -0.90           | 0.37     | -0.14     | 0.89     | 4.18                    | <0.001*  | 0.16               | 0.87     | 0.28             | 0.78     | -0.31                  | 0.76     | 0.71              | 0.48     | 2.06               | 0.05     |
| Performance status       | 1.80     | 0.08     | 0.42     | 0.68     | 1.96            | 0.06     | 0.00      | >0.99    | -3.33                   | 0.002*   | -0.60              | 0.55     | -1.03            | 0.31     | -0.12                  | 0.91     | -1.88             | 0.07     | -1.35              | 0.19     |
| Cognitive function       | -0.22    | 0.83     | -0.13    | 0.90     | 0.84            | 0.40     | 1.11      | 0.28     | 0.37                    | 0.72     | 1.11               | 0.28     | -1.17            | 0.25     | 0.86                   | 0.40     | 1.01              | 0.32     | -0.08              | 0.94     |
| Social function          | 0.10     | 0.92     | 0.20     | 0.84     | 0.80            | 0.43     | 0.75      | 0.46     | -1.25                   | 0.22     | -1.42              | 0.16     | -2.07            | 0.04     | -0.43                  | 0.67     | -0.69             | 0.50     | -0.40              | 0.69     |
| Overall symptom burden   | -1.06    | 0.29     | 0.02     | 0.98     | -0.72           | 0.48     | -0.85     | 0.40     | 4.27                    | <0.001*  | -0.40              | 0.69     | 1.20             | 0.24     | -0.46                  | 0.65     | 2.43              | 0.02     | 1.60               | 0.12     |

Abbreviations: FACT-G, Functional Assessment of Cancer Therapy-General; HRQOL, health-related quality of life; PROMIS, Patient-Reported Outcomes Measurement Information System.

Notes: T-values and p-values represent results of independent samples t-tests assessing differences in patient-reported outcome scores at baseline by patient characteristics. High marrow burden was defined as ≥50% CD138-positive plasma cells in pre-treatment bone marrow core biopsy. Patient characteristics were coded as follows: Sex: 1=female vs. 0=male; Race/ethnicity: 1=non-Hispanic White vs. 0=other; Education: 1=college degree or more vs. 0=less than college degree; Extramedullary disease: 1=yes vs. 0=no; High marrow burden: 1=yes vs. 0=no; Bridging therapy: 1=yes vs. 0=no; Refractory status: 1=penta-refractory vs. 0=not penta-refractory; KarMMa eligibility: 1=met vs. 0=did not meet. \*p<0.01.

**Supplemental Table S3.** Results of linear mixed models evaluating estimated mean change from baseline for the HRQOL outcomes.

|                       | D0    | D7                 | D14                | D21                | D30   | D60               | D90               |
|-----------------------|-------|--------------------|--------------------|--------------------|-------|-------------------|-------------------|
| Overall HRQOL         |       |                    |                    |                    |       |                   |                   |
| Estimate              | 0.11  | -1.33              | -2.42              | -1.53              | -0.65 | 4.80 <sup>†</sup> | 5.01 <sup>†</sup> |
| Standard error        | 1.90  | 1.85               | 1.82               | 1.82               | 1.82  | 1.80              | 1.80              |
| <i>t</i> -value       | 0.06  | -0.72              | -1.33              | -0.84              | -0.36 | 2.66              | 2.78              |
| <i>p</i> -value       | 0.95  | 0.47               | 0.19               | 0.40               | 0.72  | 0.008*            | 0.006*            |
| Physical well-being   |       |                    |                    |                    |       |                   |                   |
| Estimate              | 0.88  | 0.17               | 1.00               | 0.76               | 1.14  | 2.82 <sup>†</sup> | 2.40 <sup>†</sup> |
| Standard error        | 0.79  | 0.78               | 0.77               | 0.76               | 0.76  | 0.76              | 0.76              |
| <i>t</i> -value       | 1.10  | 0.22               | 1.30               | 0.99               | 1.49  | 3.73              | 3.17              |
| <i>p</i> -value       | 0.27  | 0.83               | 0.20               | 0.32               | 0.14  | <0.001*           | 0.002*            |
| Functional well-being |       |                    |                    |                    |       |                   |                   |
| Estimate              | -1.83 | -2.49 <sup>‡</sup> | -3.45 <sup>‡</sup> | -2.68 <sup>‡</sup> | -1.76 | 0.27              | 1.05              |
| Standard error        | 0.86  | 0.84               | 0.82               | 0.82               | 0.82  | 0.82              | 0.82              |
| <i>t</i> -value       | -2.13 | -2.97              | -4.19              | -3.25              | -2.13 | 0.33              | 1.29              |
| <i>p</i> -value       | 0.03  | 0.003*             | <0.001*            | 0.001*             | 0.03  | 0.75              | 0.20              |
| Emotional well-being  |       |                    |                    |                    |       |                   |                   |
| Estimate              | 1.01  | 1.27               | 1.28               | 1.32               | 0.61  | 1.29              | 1.20              |
| Standard error        | 0.50  | 0.49               | 0.48               | 0.48               | 0.48  | 0.48              | 0.48              |
| <i>t</i> -value       | 2.01  | 2.59               | 2.65               | 2.73               | 1.27  | 2.69              | 2.51              |
| <i>p</i> -value       | 0.046 | 0.01               | 0.009*             | 0.007*             | 0.21  | 0.008*            | 0.01              |
| Social well-being     |       |                    |                    |                    |       |                   |                   |
| Estimate              | 0.04  | -0.25              | -1.21              | -1.11              | -0.78 | 0.32              | -0.40             |
| Standard error        | 0.68  | 0.67               | 0.65               | 0.65               | 0.66  | 0.65              | 0.64              |
| <i>t</i> -value       | 0.06  | -0.37              | -1.85              | -1.71              | -1.19 | 0.50              | -0.61             |
| <i>p</i> -value       | 0.96  | 0.71               | 0.07               | 0.09               | 0.24  | 0.62              | 0.54              |
| Daily Measure         | D0    | D1                 | D2                 | D3                 | D4    | D5                | D6                |
| FACT-G7 HRQOL         |       |                    |                    |                    |       |                   |                   |
| Estimate              | -0.14 | 0.52               | 1.13               | 0.51               | -0.05 | 1.08              | 2.00 <sup>†</sup> |
| Standard error        | 0.77  | 0.89               | 0.80               | 0.77               | 0.81  | 0.75              | 0.75              |
| <i>t</i> -value       | -0.18 | 0.58               | 1.42               | 0.66               | -0.06 | 1.43              | 2.67              |
| <i>p</i> -value       | 0.86  | 0.56               | 0.16               | 0.51               | 0.95  | 0.15              | 0.008*            |

Abbreviations: D, day; FACT-G, Functional Assessment of Cancer Therapy-General; HRQOL, health-related quality of life. Notes: D0 was day of CAR T-cell infusion. T-values and p-values represent results of linear mixed models assessing change from baseline. \**p*<0.01. <sup>†</sup>Clinically meaningful improvement. <sup>‡</sup>Clinically meaningful deterioration.

**Supplemental Table S4.** Results of linear mixed models evaluating estimated mean changes from baseline for the symptom outcomes.

|                        | D0    | D7      | D14     | D21    | D30    | D60   | D90    |
|------------------------|-------|---------|---------|--------|--------|-------|--------|
| Fatigue                |       |         |         |        |        |       |        |
| Estimate               | 0.95  | 5.07‡   | 2.69    | 2.96   | 2.37   | -1.60 | -2.04  |
| Standard error         | 1.30  | 1.25    | 1.22    | 1.22   | 1.21   | 1.21  | 1.22   |
| <i>t</i> -value        | 0.73  | 4.05    | 2.20    | 2.43   | 1.95   | -1.32 | -1.67  |
| <i>p</i> -value        | 0.46  | <0.001* | 0.03    | 0.02   | 0.05   | 0.19  | 0.10   |
| Pain interference      |       |         |         |        |        |       |        |
| Estimate               | 0.06  | -0.71   | -0.19   | -0.81  | -0.79  | -2.18 | -2.37  |
| Standard error         | 1.29  | 1.24    | 1.22    | 1.21   | 1.20   | 1.21  | 1.21   |
| <i>t</i> -value        | 0.05  | -0.57   | -0.16   | -0.67  | -0.66  | -1.81 | -1.96  |
| <i>p</i> -value        | 0.96  | 0.57    | 0.87    | 0.51   | 0.51   | 0.07  | 0.05   |
| Sleep disturbance      |       |         |         |        |        |       |        |
| Estimate               | 1.70  | 1.84    | 0.38    | -0.97  | -0.35  | -1.93 | -3.07  |
| Standard error         | 1.49  | 1.44    | 1.40    | 1.40   | 1.39   | 1.40  | 1.40   |
| <i>t</i> -value        | 1.14  | 1.28    | 0.27    | -0.69  | -0.25  | -1.38 | -2.19  |
| <i>p</i> -value        | 0.26  | 0.20    | 0.79    | 0.49   | 0.80   | 0.17  | 0.03   |
| Depression             |       |         |         |        |        |       |        |
| Estimate               | -0.41 | -1.10   | 0.29    | -0.24  | 0.46   | -1.08 | -0.73  |
| Standard error         | 1.03  | 0.99    | 0.96    | 0.96   | 0.96   | 0.96  | 0.96   |
| <i>t</i> -value        | -0.40 | -1.11   | 0.30    | -0.25  | 0.48   | -1.13 | -0.76  |
| <i>p</i> -value        | 0.69  | 0.27    | 0.76    | 0.80   | 0.63   | 0.26  | 0.45   |
| Anxiety                |       |         |         |        |        |       |        |
| Estimate               | 1.24  | -1.53   | -1.39   | -1.49  | -0.56  | -2.69 | -1.90  |
| Standard error         | 1.12  | 1.08    | 1.05    | 1.05   | 1.05   | 1.05  | 1.05   |
| <i>t</i> -value        | 1.11  | -1.42   | -1.32   | -1.41  | -0.53  | -2.57 | -1.82  |
| <i>p</i> -value        | 0.270 | 0.16    | 0.19    | 0.16   | 0.60   | 0.01  | 0.07   |
| Global pain            |       |         |         |        |        |       |        |
| Estimate               | 0.07  | -0.58   | -0.37   | -0.71  | -0.84  | -0.49 | -0.73  |
| Standard error         | 0.33  | 0.32    | 0.31    | 0.31   | 0.31   | 0.31  | 0.31   |
| <i>t</i> -value        | 0.21  | -1.82   | -1.19   | -2.29  | -2.73  | -1.58 | -2.34  |
| <i>p</i> -value        | 0.84  | 0.07    | 0.24    | 0.02   | 0.007* | 0.12  | 0.02   |
| Performance status     |       |         |         |        |        |       |        |
| Estimate               | -1.87 | -4.49   | -3.90   | -3.48  | -3.45  | -0.45 | -0.57  |
| Standard error         | 1.04  | 1.00    | 0.98    | 0.98   | 0.98   | 0.98  | 0.98   |
| <i>t</i> -value        | -1.80 | -4.49   | -3.96   | -3.54  | -3.54  | -0.46 | -0.58  |
| <i>p</i> -value        | 0.07  | <0.001* | <0.001* | 0.001* | 0.001* | 0.65  | 0.56   |
| Cognitive function     |       |         |         |        |        |       |        |
| Estimate               | 1.33  | -0.03   | 0.58    | -0.28  | 1.48   | 1.88  | 3.98   |
| Standard error         | 1.47  | 1.42    | 1.39    | 1.38   | 1.37   | 1.38  | 1.38   |
| <i>t</i> -value        | 0.90  | -0.02   | 0.41    | -0.20  | 1.08   | 1.36  | 2.88   |
| <i>p</i> -value        | 0.37  | 0.99    | 0.68    | 0.84   | 0.28   | 0.18  | 0.004* |
| Social function        |       |         |         |        |        |       |        |
| Estimate               | 1.13  | -1.59   | -2.44   | -2.49  | -1.56  | 1.77  | 2.69   |
| Standard error         | 1.25  | 1.21    | 1.19    | 1.18   | 1.17   | 1.18  | 1.18   |
| <i>t</i> -value        | 0.90  | -1.32   | -2.05   | -2.12  | -1.34  | 1.51  | 2.28   |
| <i>p</i> -value        | 0.37  | 0.19    | 0.041   | 0.04   | 0.18   | 0.13  | 0.02   |
| Overall symptom burden |       |         |         |        |        |       |        |
| Estimate               | -0.04 | 0.34    | -0.15   | -0.13  | -0.25  | -0.23 | -0.39  |
| Standard error         | 0.14  | 0.14    | 0.13    | 0.13   | 0.13   | 0.13  | 0.13   |
| <i>t</i> -value        | -0.26 | 2.48    | -1.13   | -0.95  | -1.84  | -1.71 | -2.95  |
| <i>p</i> -value        | 0.80  | 0.01    | 0.26    | 0.34   | 0.07   | 0.09  | 0.004* |

Abbreviations: D, day. Notes: D0 was day of CAR T-cell infusion. T-values and p-values represent results of linear mixed models assessing change from baseline. \**p*<0.01. †Clinically meaningful improvement. ‡Clinically meaningful deterioration.

**Supplemental Table S5.** Proportions of participants with and median time to stable improvement and deterioration for each patient-reported outcome.

|                            | Stable Improvement            |                                   | Stable Deterioration            |                                     |
|----------------------------|-------------------------------|-----------------------------------|---------------------------------|-------------------------------------|
|                            | n (%) with stable improvement | Median days to stable improvement | n (%) with stable deterioration | Median days to stable deterioration |
| FACT-G                     |                               |                                   |                                 |                                     |
| Overall HRQOL              | 19 (46.3)                     | NR                                | 18 (43.9)                       | NR                                  |
| Physical well-being        | 24 (58.5)                     | 60                                | 13 (31.7)                       | NR                                  |
| Functional well-being      | 9 (22.0)                      | NR                                | 28 (68.3)                       | 14                                  |
| Emotional well-being       | 22 (53.7)                     | 60                                | 12 (29.3)                       | NR                                  |
| Social well-being          | 10 (24.4)                     | NR                                | 11 (26.8)                       | NR                                  |
| PROMIS-29 + 2 Profile v2.1 |                               |                                   |                                 |                                     |
| Fatigue                    | 11 (26.8)                     | NR                                | 16 (39.0)                       | NR                                  |
| Pain interference          | 16 (39.0)                     | NR                                | 8 (19.5)                        | NR                                  |
| Sleep disturbance          | 14 (34.1)                     | NR                                | 10 (24.4)                       | NR                                  |
| Depression                 | 8 (19.5)                      | NR                                | 6 (14.6)                        | NR                                  |
| Anxiety                    | 14 (34.1)                     | NR                                | 7 (17.1)                        | NR                                  |
| Global pain                | 14 (34.1)                     | NR                                | 5 (12.2)                        | NR                                  |
| Performance status         | 3 (7.3)                       | NR                                | 16 (39.0)                       | NR                                  |
| Cognitive function         | 14 (34.1)                     | NR                                | 16 (39.0)                       | NR                                  |
| Social function            | 12 (29.3)                     | NR                                | 13 (31.7)                       | NR                                  |
| Overall symptom burden     | 17 (41.5)                     | NR                                | 8 (19.5)                        | NR                                  |

*Abbreviations:* FACT-G, Functional Assessment of Cancer Therapy-General; HRQOL, health-related quality of life; NR, not reached (i.e., less than half of participants reached stable improvement or deterioration by day 90); PROMIS, Patient-Reported Outcomes Measurement Information System.
